# Supplementary material for: Fourier Transform Infrared Spectroscopy of “Bisphenol A”
Source: Hindawi journal article supplement (doi:10.1155/2016/2073613), 2016-01-01
Supplement: f1 [file 2073613.f1.pdf]

| Bisphenol A        |                   |       |
|--------------------|-------------------|-------|
| Calculation Type   | FREQ              |       |
| Calculation Method | RB3LYP            |       |
| Basis Set          | 6-311++G(3df,3pd) |       |
| Charge             | 0                 |       |
| Spin               | Singlet           |       |
| E(RB3LYP)          | -731.93409308     | a.u.  |
| RMS Gradient Norm  | 0.00000221        | a.u.  |
| Imaginary Freq     | 0                 |       |
| Dipole Moment      | 0.9136            | Debye |
| Point Group        | C1                |       |
